# Supplementary material for: ME-Class2 reveals context dependent regulatory roles for 5-hydroxymethylcytosine
Source: PubMed Central journal article supplement — Nucleic Acids Res. 2019 Jan 16;47(5):e28. doi: 10.1093/nar/gkz001 (PMC6412249; doi:10.1093/nar/gkz001), 2019-01-16
Supplement: gkz001_supplemental_files.pdf [file gkz001_supplemental_files.pdf]

## SUPPLEMENTARY FIGURES AND TABLES

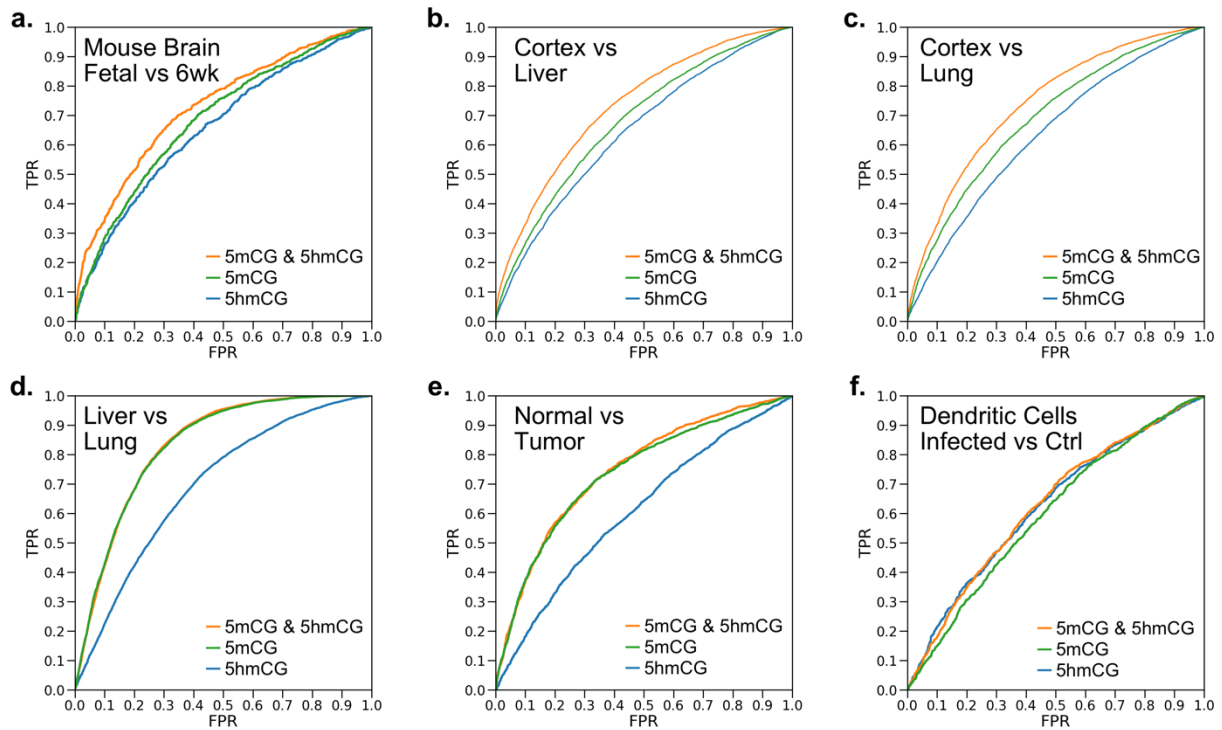

**Supplementary Figure S1.** ROC analysis of ME-Class2 using the HRPS (high-resolution promoter signature) feature model for different 5mCG and 5hmCG datasets. ROC AUC are Mouse brain: 5mCG: 0.688, 5hmCG: 0.661, 5mCG & 5hmCG: 0.724; Human cortex versus liver: 5mCG: 0.679, 5hmCG: 0.644, 5mCG & 5hmCG: 0.732; Human cortex versus lung: 5mCG: 0.688, 5hmCG: 0.634, 5mCG & 5hmCG: 0.739; Dendritic cells: 5mCG: 0.597, 5hmCG: 0.622, 5mCG & 5hmCG: 0.625; Liver vs Lung: 5mCG: 0.829, 5hmCG: 0.692, 5mCG & 5hmCG: 0.830. Normal vs Tumor: 5mCG: 0.736, 5hmCG: 0.605, 5mCG & 5hmCG: 0.745.

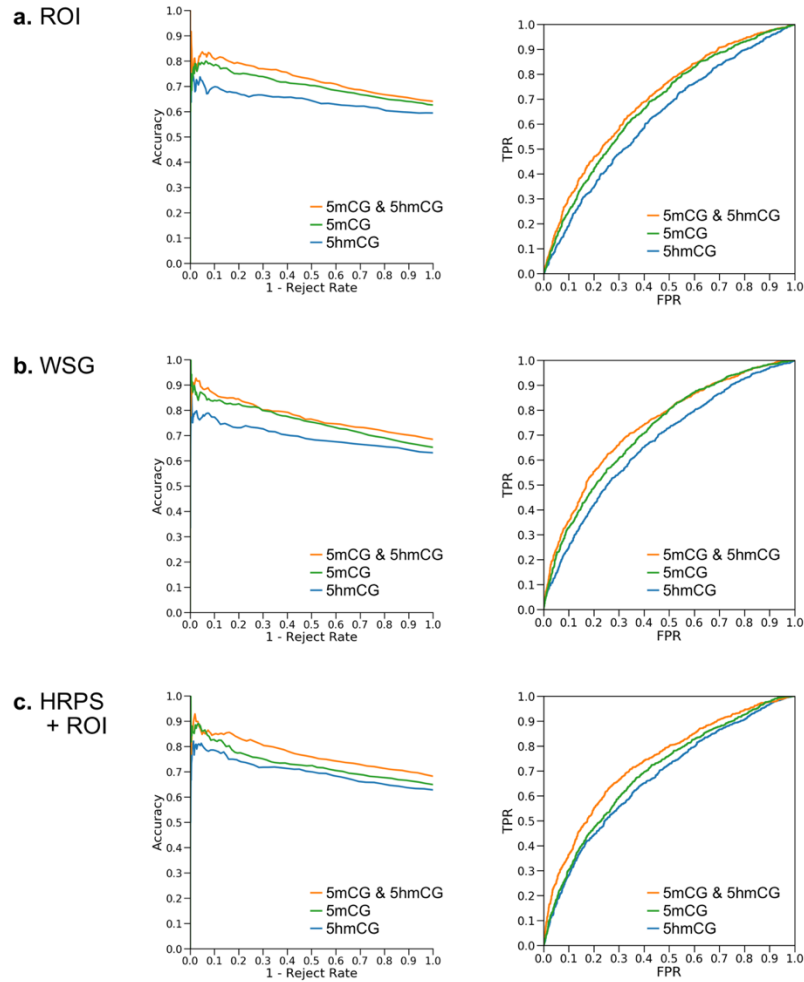

**Supplementary Figure S2.** Performance of ME-Class2 using different feature models for fetal-6wk mouse brain 5mCG and 5hmCG data. ROI is region of interest; WSG is whole-scale gene; and HRPS+ROI is a combination of HRPS (high-resolution promoter signature) and ROI features. ROC AUC are ROI: 5mCG: 0.679, 5hmCG: 0.646, 5mCG & 5hmCG: 0.707; WSG: 5mCG: 0.729, 5hmCG: 0.663, 5mCG & 5hmCG: 0.742; HRPS + ROI: 5mCG: 0.699, 5hmCG: 0.671, 5mCG & 5hmCG: 0.737.

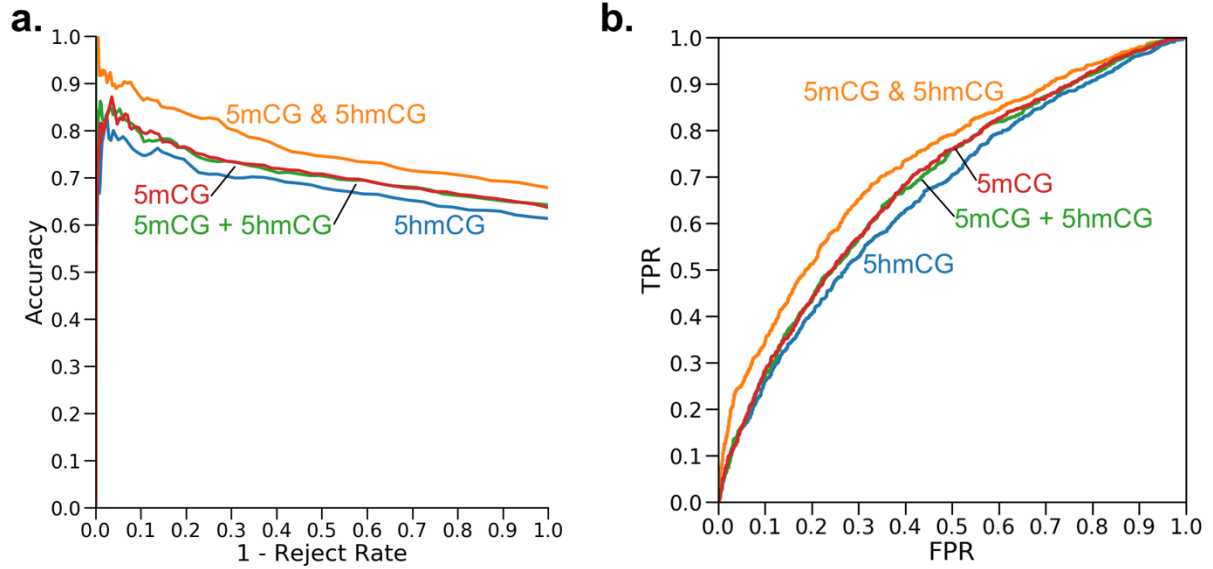

**Supplementary Figure S3.** Performance of different gene models using ME-Class2 5mCG and 5hmCG data from fetal and 6-week mouse brain as evaluated using (a) accuracy versus 1-reject rate (b) and ROC (receiver operating characteristic) curve analysis. 5mCG & 5hmCG indicates using 5mC and 5hmC data independently in the input feature vector. 5mCG + 5hmCG is the sum of 5mC and 5hmC signals used for the input feature vector. ROC AUC are 5mCG: 0.688, 5hmCG: 0.661, 5mCG & 5hmCG: 0.724, 5mCG + 5hmCG: 0.689.

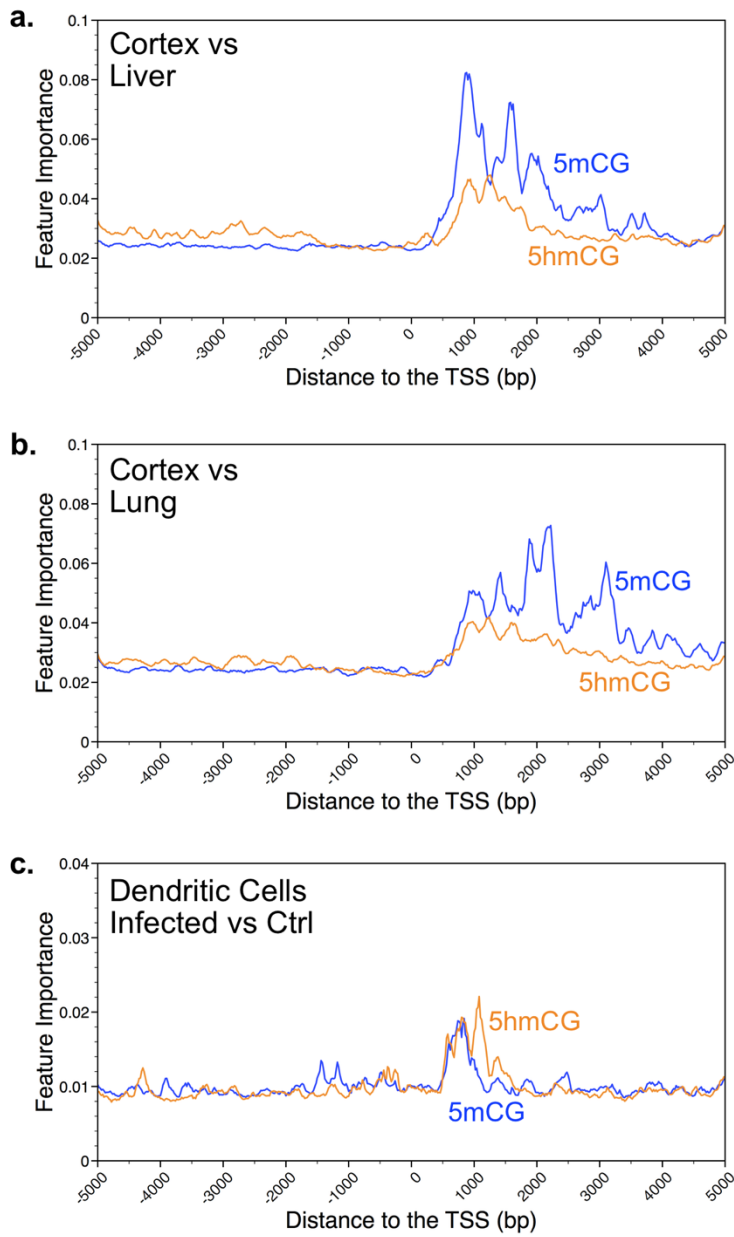

**Supplementary Figure S4.** Feature importance for the ME-Class2 random forest classifier for HRPS model using 5mCG and 5hmCG data for human (a) cortex versus liver, (b) cortex versus lung, and (c) infected versus non-infected dendritic cell comparisons.

### a. Liver-Lung

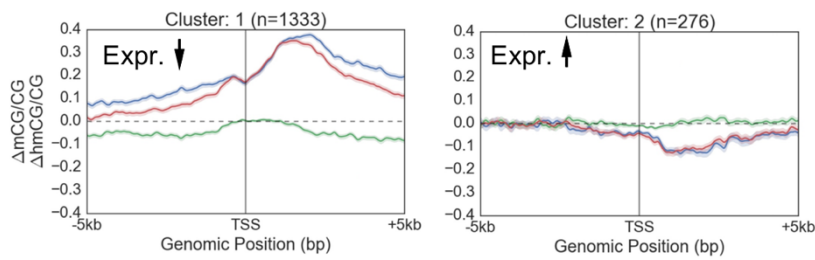

### b. Normal-Tumor

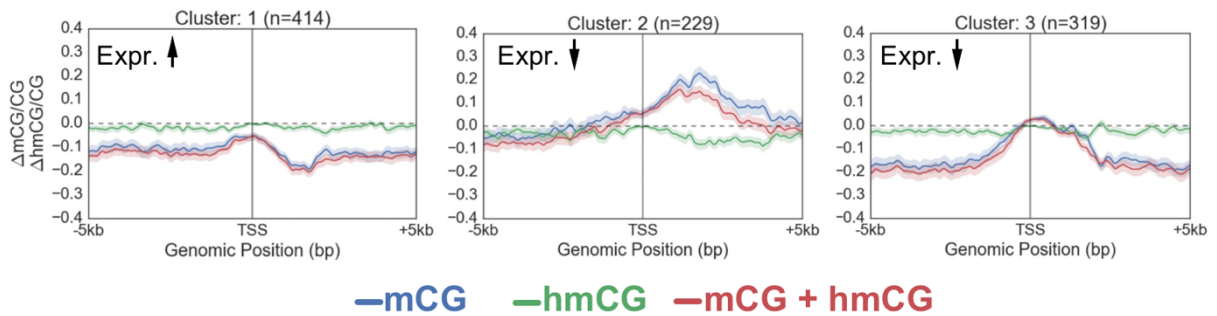

**Supplementary Figure S5.** Metagene plots for major clusters whose methylation signature is predictive of expression observed in (a) human lung versus liver and (b) paired human lung and liver normal versus tumor comparisons. Differential 5mCG and 5hmCG is lung – liver or tumor – normal. Up arrows indicate genes in the cluster increased in expression in lung relative to normal or tumor versus normal. Down arrows indicate the reverse. Shading indicates the 68% bootstrapped confidence interval.

**a. Cortex vs Liver**

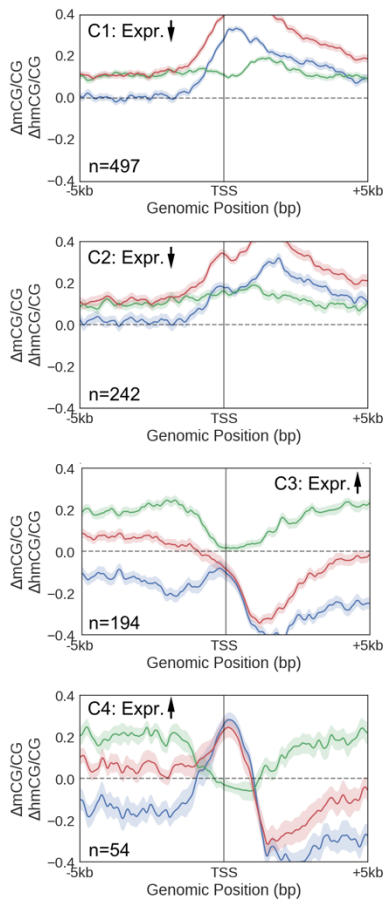

—mCG  
—hmCG  
—mCG + hmCG

**b. Cortex vs Lung**

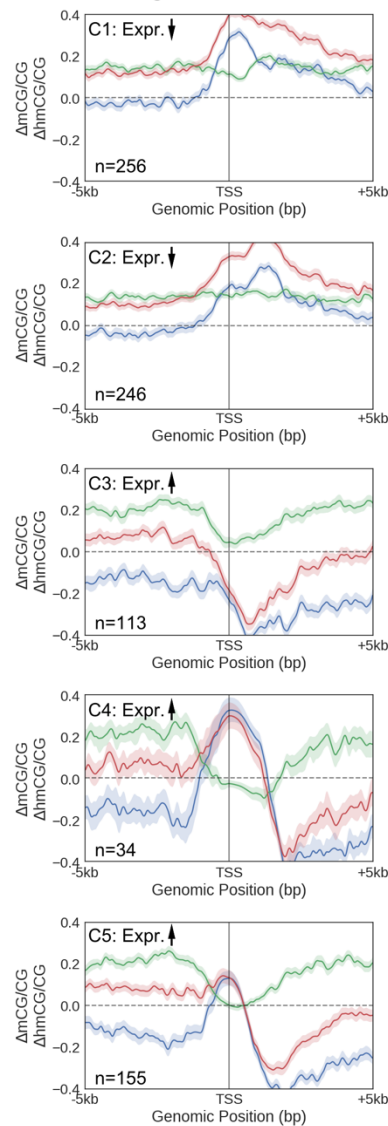

**Supplementary Figure S6.** Metagene plots for major clusters whose methylation signature is predictive of expression observed in (a) human cortex versus liver and (b) human cortex versus lung comparisons. Differential 5mCG and 5hmCG is brain – liver or brain – lung. Up arrows indicate genes in the cluster increased in expression in cortex relative to liver or cortex relative to lung. Down arrows indicate the reverse. Shading indicates the 68% bootstrapped confidence interval

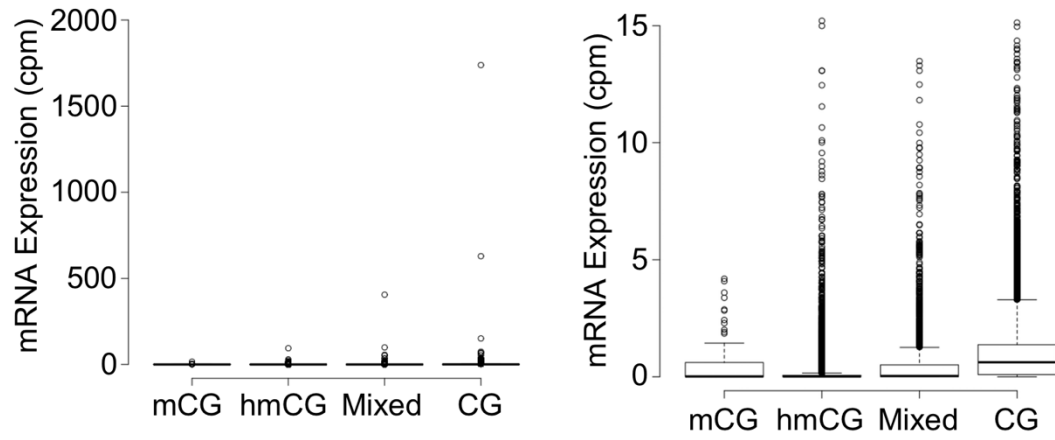

**Supplementary Figure S7.** Original plot and an in between zoom for plot from Figure 4g. mRNA expression in granule cells of genes whose promoters (defined as [-800bp, +2kb] around the TSS) are greater than 50% marked by mCG, hmCG, a combination of mCG and hmCG, or greater than 50% unmethylated, CG. Outliers have been cropped for clarity.

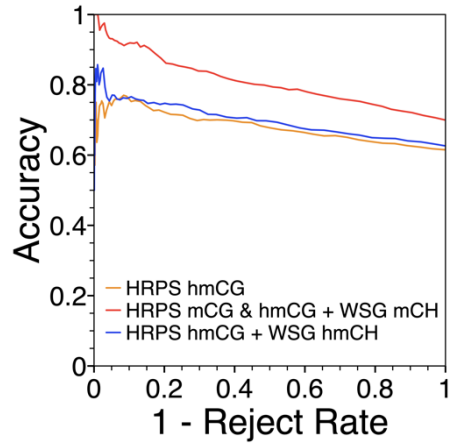

**Supplementary Figure S8.** Performance of different gene models using ME-Class2 5mC and 5hmC data from fetal and 6-week mouse brain as evaluated using accuracy versus 1-reject rate.



**Supplementary Table S1.** MLML results, including coverage statistics for all datasets included in the analysis. CpG Coverage is accepted CpGs / total genomic CpGs.

| Study                               | Design                            |          |                      | MLML Statistics |           |               |              |
|-------------------------------------|-----------------------------------|----------|----------------------|-----------------|-----------|---------------|--------------|
|                                     | 5hmC assay                        | Organism | Sample               | Overshoot       | Conflicts | Accepted CpGs | CpG Coverage |
| Li et al. <i>Genome Res</i> 2016    | oxBS-seq                          | Human    | Liver_N1             | 7483717         | 45698     | 23373853      | 0.828        |
|                                     | oxBS-seq                          | Human    | Liver_N2             | 7779952         | 35689     | 23281047      | 0.825        |
|                                     | oxBS-seq                          | Human    | Liver_N3             | 8830879         | 63528     | 23395102      | 0.829        |
|                                     | oxBS-seq                          | Human    | Liver_T1             | 8706959         | 56985     | 23027265      | 0.816        |
|                                     | oxBS-seq                          | Human    | Liver_T2             | 9048391         | 63705     | 24285424      | 0.861        |
|                                     | oxBS-seq                          | Human    | Liver_T3             | 9388948         | 71465     | 23380024      | 0.829        |
|                                     | oxBS-seq                          | Human    | Lung_N1              | 9487853         | 64312     | 24490004      | 0.868        |
|                                     | oxBS-seq                          | Human    | Lung_N2              | 8515568         | 53325     | 23425058      | 0.830        |
|                                     | oxBS-seq                          | Human    | Lung_N3              | 8184630         | 28879     | 23159840      | 0.821        |
|                                     | oxBS-seq                          | Human    | Lung_T1              | 10236654        | 94104     | 24675947      | 0.874        |
|                                     | oxBS-seq                          | Human    | Lung_T2              | 9656229         | 84745     | 23617849      | 0.837        |
|                                     | oxBS-seq                          | Human    | Lung_T3              | 9529502         | 47862     | 23186713      | 0.822        |
|                                     | Lister et al. <i>Science</i> 2013 | TAB-seq  | Mouse                | Fetal_Brain     | 250772    | 1             | 19634599     |
| TAB-seq                             |                                   | Mouse    | 6wk_Brain            | 242633          | 5         | 19875929      | 0.931        |
| Pacis et al. <i>Genome Res</i> 2017 | TAB-seq                           | Human    | Ctrl Dendritic Cells | 180799          | 10        | 23475529      | 0.832        |
|                                     | TAB-seq                           | Human    | Inf. Dendritic Cells | 177185          | 3         | 23505262      | 0.833        |
| Mellen et al. <i>PNAS</i> 2017      | oxBS-seq                          | Mouse    | Granule Cells 1      | 2779858         | 16289     | 12733479      | 0.597        |
|                                     | oxBS-seq                          | Mouse    | Granule Cells 2      | 4752111         | 153290    | 18900922      | 0.886        |
|                                     | oxBS-seq                          | Mouse    | Granule Cells 3      | 1310177         | 295330    | 6954726       | 0.326        |

**Supplementary Table S2.** Numbers of differentially expressed genes for all datasets included in the analysis.

| Organism | Sample 1                | Sample 2                | Genes<br>(FC<=-2,FC>=2) | Genes<br>(FC<=-2) | Genes<br>(FC>=2) | Genes<br>Down (%) | Genes<br>Up (%) |
|----------|-------------------------|-------------------------|-------------------------|-------------------|------------------|-------------------|-----------------|
| Human    | Liver_N1                | Lung_N1                 | 3456                    | 1554              | 1902             | 45.0%             | 55.0%           |
| Human    | Liver_N1                | Lung_N2                 | 3677                    | 1567              | 2110             | 42.6%             | 57.4%           |
| Human    | Liver_N1                | Lung_N3                 | 3562                    | 1622              | 1940             | 45.5%             | 54.5%           |
| Human    | Liver_N2                | Lung_N1                 | 2771                    | 1242              | 1529             | 44.8%             | 55.2%           |
| Human    | Liver_N2                | Lung_N2                 | 3275                    | 1494              | 1781             | 45.6%             | 54.4%           |
| Human    | Liver_N2                | Lung_N3                 | 3077                    | 1541              | 1536             | 50.1%             | 49.9%           |
| Human    | Liver_N3                | Lung_N1                 | 2179                    | 1150              | 1029             | 52.8%             | 47.2%           |
| Human    | Liver_N3                | Lung_N2                 | 2542                    | 1224              | 1318             | 48.2%             | 51.8%           |
| Human    | Liver_N3                | Lung_N3                 | 2544                    | 1339              | 1205             | 52.6%             | 47.4%           |
| Human    | Cortex                  | Liver_N1                | 6370                    | 2949              | 3421             | 46.3%             | 53.7%           |
| Human    | Cortex                  | Liver_N2                | 6292                    | 2782              | 3510             | 44.2%             | 55.8%           |
| Human    | Cortex                  | Liver_N3                | 6374                    | 2682              | 3692             | 42.1%             | 57.9%           |
| Human    | Cortex                  | Lung_N1                 | 5955                    | 2439              | 3516             | 41.0%             | 59.0%           |
| Human    | Cortex                  | Lung_N2                 | 5896                    | 2400              | 3496             | 40.7%             | 59.3%           |
| Human    | Cortex                  | Lung_N3                 | 5864                    | 2465              | 3399             | 42.0%             | 58.0%           |
| Human    | Liver_N1                | Liver_T1                | 1855                    | 1061              | 794              | 57.2%             | 42.8%           |
| Human    | Liver_N2                | Liver_T2                | 2550                    | 1926              | 624              | 75.5%             | 24.5%           |
| Human    | Lung_N1                 | Lung_T1                 | 2196                    | 1270              | 926              | 57.8%             | 42.2%           |
| Human    | Lung_N2                 | Lung_T2                 | 403                     | 250               | 153              | 62.0%             | 38.0%           |
| Human    | Lung_N3                 | Lung_T3                 | 2767                    | 1559              | 1208             | 56.3%             | 43.7%           |
| Mouse    | Fetal_Brain             | 6wk_Brain               | 3654                    | 2063              | 1591             | 56.5%             | 43.5%           |
| Human    | Ctrl Dendritic<br>Cells | Inf. Dendritic<br>Cells | 3933                    | 2115              | 1818             | 53.8%             | 46.2%           |

**Supplementary Table S3.** Correctly predicted genes using a cutoff of accuracy=90% for infected versus control dendritic cells. Expression fold change is negative for down-regulated genes and positive for up-regulated genes.

|                | <b>RefSeq</b> | <b>Expression<br/>Fold Change</b> | <b>Gene<br/>Name</b> |
|----------------|---------------|-----------------------------------|----------------------|
| Down-regulated | NM_030806     | -3.1                              | C1orf21              |
|                | NM_014858     | -9.4                              | TMCC2                |
|                | NM_002051     | -4.4                              | GATA3                |
|                | NM_005933     | -4.1                              | MLL                  |
|                | NM_001759     | -2.7                              | CCND2                |
|                | NM_020403     | -16.3                             | PCDH9                |
|                | NM_015559     | -2.1                              | SETBP1               |
|                | NM_198461     | -66.8                             | LONRF2               |
|                | NM_012120     | -2.3                              | CD2AP                |
|                | NM_005375     | -2.9                              | MYB                  |
|                | NM_001259     | -6.2                              | CDK6                 |
|                | NM_001394     | -190.8                            | DUSP4                |
|                | NM_004789     | -5.1                              | LHX2                 |
|                | NM_006603     | -2.4                              | STAG2                |
| Up-regulated   | NM_000913     | 4.8                               | OPRL1                |

**Supplementary Table S4.** Results from DAVID analysis of genes identified in each cluster in Fig. 4. Enrichment results for brain development and neuronal function related categories are shown. Genes may be found in multiple categories. UP\_KEYWORDS are UniprotKB keywords.

| Gene Cluster | DAVID Ontology Category                                     | Bonf. Adjusted p-value | Count                               | Fold Enrichment | RefSeq ID    | Gene Name  | Gene Description                                               |
|--------------|-------------------------------------------------------------|------------------------|-------------------------------------|-----------------|--------------|------------|----------------------------------------------------------------|
| C1           | Brain development, GO:0007420                               | 0.71                   | 6                                   | 7.1             | NM_013627    | Pax6       | Paired box 6                                                   |
|              |                                                             |                        |                                     |                 | NM_008130    | Gli3       | GLI-Kruppel family member                                      |
|              |                                                             |                        |                                     |                 | NM_010710    | Lhx2       | LIM Homeobox protein 2                                         |
|              |                                                             |                        |                                     |                 | NM_007552    | Bmi1       | Bmi1 polycomb ring finger oncogene                             |
|              |                                                             |                        |                                     |                 | NM_152229    | Nr2e1      | Nuclear receptor subfamily 2, group E, member 1                |
|              |                                                             |                        |                                     |                 | NM_016701    | Nes        | Nestin                                                         |
|              | Negative regulation of neuronal differentiation, GO:0045665 | 0.0092                 | 6                                   | 20.1            | NM_013627    | Pax6       | Paired box 6                                                   |
|              |                                                             |                        |                                     |                 | NM_008130    | Gli3       | GLI-Kruppel family member                                      |
|              |                                                             |                        |                                     |                 | NM_152229    | Nr2e1      | Nuclear receptor subfamily 2, group E, member 1                |
|              |                                                             |                        |                                     |                 | NM_008714    | Notch1     | Notch 1                                                        |
|              |                                                             |                        |                                     |                 | NM_008783    | Pbx1       | Pre B cell leukemia homeobox 1                                 |
|              | NM_007865                                                   | Dll1                   | Delta like canonical Notch ligand 1 |                 |              |            |                                                                |
|              | Neuronal stem cell population maintenance, GO:0097150       | 0.094                  | 4                                   | 40.7            | NM_009951    | Igf2bp1    | Insulin-like growth factor 2 mRNA binding protein 1            |
|              |                                                             |                        |                                     |                 | NM_008714    | Notch1     | Notch 1                                                        |
|              |                                                             |                        |                                     |                 | NM_007865    | Dll1       | Delta like canonical Notch ligand 1                            |
| NM_007664    |                                                             |                        |                                     |                 | Cdh2         | Cadherin 2 |                                                                |
| C2           | Synapse, UP_KEYWORDS                                        | 0.59                   | 4                                   | 8.8             | NM_001009818 | Sept11     | septin 11                                                      |
|              |                                                             |                        |                                     |                 | NM_053167    | Trim9      | tripartite motif-containing 9                                  |
|              |                                                             |                        |                                     |                 | NM_021604    | Agrn       | agrin                                                          |
|              |                                                             |                        |                                     |                 | NM_001081370 | Shank2     | SH3 and multiple ankyrin repeat domains 2                      |
| C3           | Synapse, UP_KEYWORDS                                        | 0.007                  | 8                                   | 7.3             | NM_183023    | Rims4      | regulating synaptic membrane exocytosis 4                      |
|              |                                                             |                        |                                     |                 | NM_027712    | Dlgap1     | DLG associated protein 1                                       |
|              |                                                             |                        |                                     |                 | NM_019697    | Kcnd2      | potassium voltage-gated channel, Shal-related family, member 2 |
|              |                                                             |                        |                                     |                 | NM_022030    | Sv2a       | synaptic vesicle glycoprotein 2 a                              |
|              |                                                             |                        |                                     |                 | NM_020252    | Nrxn1      | neurexin I (Nrxn1), transcript variant 1                       |
|              |                                                             |                        |                                     |                 | NM_016758    | Rgs14      | regulator of G-protein signaling 14                            |
|              |                                                             |                        |                                     |                 | NM_011861    | Pacsin1    | protein kinase C and casein kinase substrate in neurons 1      |
|              |                                                             |                        |                                     |                 | NM_008169    | Grin1      | glutamate receptor, ionotropic, NMDA1 (zeta 1)                 |
